# Supplementary material for: The Genetic Landscape of Clinical Resistance to RAF Inhibition in Metastatic Melanoma
Source: Oxford University Press journal article supplement (doi:10.1158/2159-8290.cd-13-0617), 2013-11-21
Supplement: 21598290cd130617-sup-table_s1.xlsx [file 21598290cd130617-sup-table_s1.xlsx]

## Sheet: Supplementary_Table1_20130610_C
#Supplementary Table 1: Clinical and raw sequencing characteristics
Patient	Gender	Age at start of therapy	Medication	Early Resistance	Duration of Therapy (weeks)	Best Response	Normal sample source	Mean Target Coverage - Germline (X)	Mean Target Coverage - Pre-treatment (X)	Mean Target Coverage - Post-relapse (X)
Pat 01	male	45	Vemurafenib	no	66	PR	whole blood	108	328	364
Pat 04	male	51	Dabrafenib	yes	5	PD	whole blood	111	101	111
Pat 05	male	40	Dabrafenib	no	25	SD	whole blood	113	286	274
Pat 06	female	57	Vemurafenib	no	17	PR	whole blood	96	572	577
Pat 07	female	26	Vemurafenib	yes	9	PD	whole blood	80	192	36
Pat 08	female	61	Vemurafenib	no	39	PR	paraffin embedded tissue	132	181	331
Pat 11	male	43	Dabrafenib	no	39	PR	paraffin embedded tissue	120	214	370
Pat 14	female	47	Vemurafenib	no	13	PR	paraffin embedded tissue	106	403	404
Pat 15	female	29	Vemurafenib	yes	6	PD	paraffin embedded tissue	114	95	403
Pat 16	female	51	Vemurafenib	no	31	PR	paraffin embedded tissue	102	267	277
Pat 21	female	44	Dabrafenib	no	30	CR	paraffin embedded tissue	104		82
Pat 22	female	36	Dabrafenib	no	42	PR	paraffin embedded tissue	130	51	298
Pat 24	male	55	Dabrafenib	no	22	PR	paraffin embedded tissue	161	247	193
Pat 26	male	44	Dabrafenib	yes	5	SD	paraffin embedded tissue	122	297	304
Pat 27	male	50	Dabrafenib	no	44	PR/SD	paraffin embedded tissue	134		315
Pat 28	male	58	Dabrafenib	no	48	SD	paraffin embedded tissue	110		153
Pat 29	female	43	Dabrafenib	yes	10	SD	paraffin embedded tissue	24	112	96
Pat 30	female	73	Dabrafenib	no	39	PR	paraffin embedded tissue	142	305	166
Pat 31	male	66	Vemurafenib	no	33	PR	paraffin embedded tissue	61	262	182
Pat 32	female	63	Vemurafenib	no	48	PR	paraffin embedded tissue	61	153	242
Pat 34	male	51	Vemurafenib	yes	6	PD	paraffin embedded tissue	37	153
Pat 36	female	51	Vemurafenib	no	21	PR	paraffin embedded tissue	17	241	116
Pat 37	male	56	Vemurafenib	no	35	SD	paraffin embedded tissue	116		295
Pat 40	female	62	Vemurafenib	no	16	PR	paraffin embedded tissue	73	150	246
Pat 41	female	76	Vemurafenib	no	18	PR	paraffin embedded tissue	83	238	233
Pat 44	male	52	Vemurafenib	no	17	PR	whole blood	117	60	183
Pat 45	male	50	Vemurafenib	no	21	PR	whole blood	127	153	168
Pat 46	female	51	Vemurafenib	yes	11	SD	whole blood	102	101	69
Pat 48	male	25	Vemurafenib	yes	9	SD	whole blood	150	95	116
Pat 49	female	66	Vemurafenib	yes	10	SD	whole blood	131	59	69
Pat 50	male	74	Vemurafenib	yes	9	PD	paraffin embedded tissue	69	133
Pat 51	male	64	Vemurafenib	no	21	SD	unavailable	63		82
Pat 53	male	53	Vemurafenib	no	14	PR	paraffin embedded tissue	7	242	170
Pat 54	female	48	Dabrafenib	yes	12	SD	whole blood	68	176
Pat 55	female	49	Dabrafenib	yes	9	SD/PR	whole blood	67	91
Pat 58	female	40	Vemurafenib	no	18	SD	Lymphocytes	145	82	269
Pat 59	male	48	Vemurafenib	no	16	PR	Lymphocytes	65	119	123
Pat 60	male	55	Vemurafenib	yes	6	PD	Lymphocytes	60	115	191
Pat 63	female	48	Vemurafenib	no	26	PR	Lymphocytes	72	77	145
Pat 65	female	47	Vemurafenib	no	31	PR	paraffin embedded tissue	60	356
Pat 66	male	71	Vemurafenib	yes	6	PD	paraffin embedded tissue	77	180
Pat 70	female	60	Vemurafenib	no	29	PR	paraffin embedded tissue	16	176	398
Pat 73	male	51	Vemurafenib	no	25	PR	paraffin embedded tissue	131	199	109
Pat 74	male	58	Vemurafenib	no	28	PR	paraffin embedded tissue	76	127	78
Pat 76	female	42	Dabrafenib	no	21	PR	paraffin embedded tissue	85	144	75
