# Supplementary material for: The Genetic Landscape of Clinical Resistance to RAF Inhibition in Metastatic Melanoma
Source: Oxford University Press journal article supplement (doi:10.1158/2159-8290.cd-13-0617), 2013-11-21
Supplement: 21598290cd130617-sup-tabls_s5.xlsx [file 21598290cd130617-sup-tabls_s5.xlsx]

## Sheet: Sheet1
#Supplementary Table 5: PI3K pathway alterations
	Resistance Class	Biopsy Time Point	PIK3CA					PTEN					PIK3R1
			Allelic Fraction	Protein Change	Predicted Function	PMID	PolyPhen2 Score	Allelic Fraction	Protein Change	Predicted Function	PMID	PolyPhen2 Score	Allelic Fraction	Protein Change	Predicted Function	PMID	PolyPhen2 Score
Patient 60	Early	Pre	0.21	p.L540F	Likely activating	21676217
		Post	0.28	p.L540F	Likely activating	21676217
Patient 34	Early	Pre											0.29	p.Q475*	Probably Damaging
		Post
Patient 07	Early	Pre						0.43	p.I67R	Probably Damaging		0.999
		Post						0.5	p.I67R	Probably Damaging		0.999
Patient 48	Early	Pre						0.72	p.Y68fs	Likely inactivating	21828076
		Post	0.19	p.H1047R	Activating	22570710; 15647370		0.22	p.Y68fs	Likely inactivating	21828076
Patient 29	Early	Pre						0.14	p.P38H	Probably Damaging		1	0.11	p.L307R	Possibly Damaging		0.933
		Post						0.09	p.P38H	Probably Damaging		1	0.12	p.L307R	Possibly Damaging		0.933
Patient 44	Acquired	Pre						0.34	p.V85L	Probably Damaging		0.997
		Post
Patient 58	Acquired	Pre						0.38	p.K128T	Inactivating	21828076
		Post						0.58	p.K128T	Inactivating	21828076
Patient 36	Acquired	Pre
		Post						N/A	Focal deletion	Inactivating	21317224
Patient 24	Acquired	Pre
		Post	0.06	p.E545G	Activating	17376864; 17673550
Patient 63	Acquired	Pre
		Post	0.2	p.P778S	Probably Damaging		1
Patient 70	Acquired	Pre
		Post						0.15	p.R233*	Probably Damaging
Patient 16	Acquired	Pre
		Post											0.02	p.G353R	Likely activating	21984976
Patient 37	Acquired	Pre
		Post						0.02	p.P204L	Likely inactivating	23633456
Patient 08	Acquired	Pre
		Post						0.47	p.C124R	Inactivating	10866302
Patient 11	Acquired	Pre						0.45	p.G129E	Inactivating	21317224; 21828076
		Post						0.65	p.G129E	Inactivating	21317224; 21828076
Patient 28	Acquired	Pre
		Post						0.68	p.D162fs	Inactivating	21828076
Patient 01	Acquired	Pre						0.8	p.H93D	Inactivating	21828076
		Post
